# Supplementary material for: Discovering genetic interactions bridging pathways in genome-wide association studies
Source: PubMed Central journal article supplement (PMC6753138; doi:10.1038/s41467-019-12131-7), 2019-09-19
Supplement: 41467_2019_12131_MOESM1_ESM.pdf [file 41467_2019_12131_MOESM1_ESM.pdf]

1

## **Supplementary Information**

2

Discovering genetic interactions bridging pathways in genome-wide association studies

3

Fang and Wang et.al.

4

5

6

7

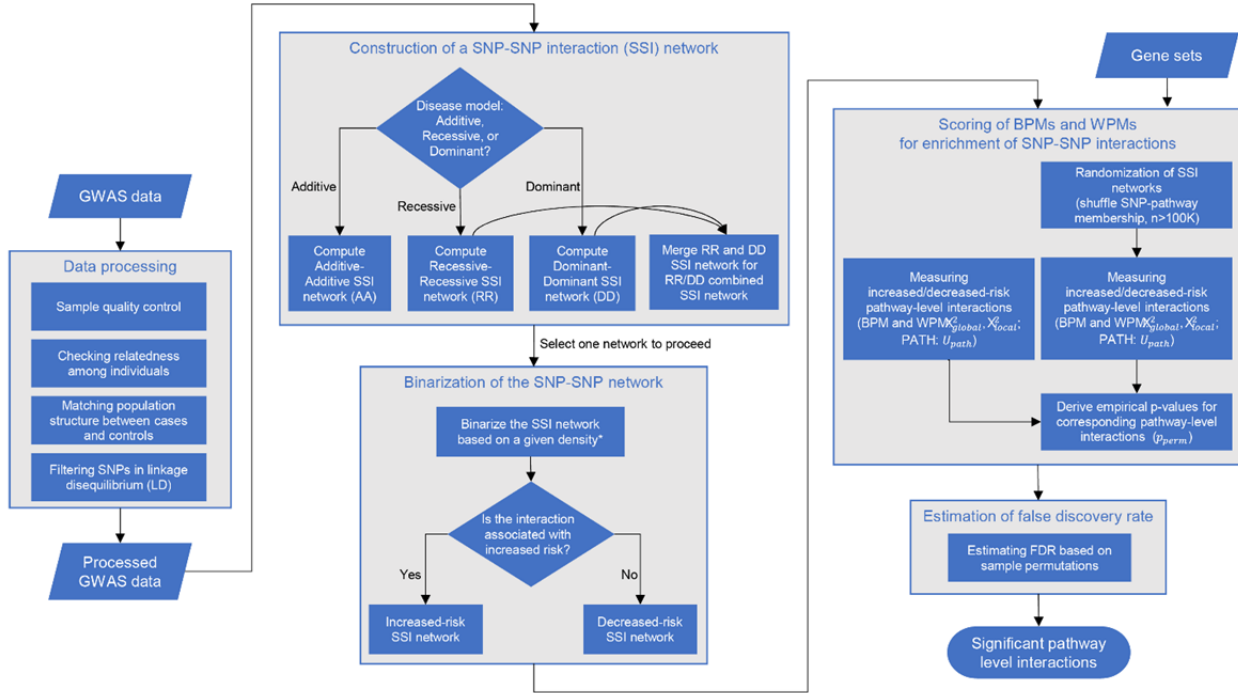

8 \* Binarization density is determined based on a pilot run (See method)

9 Supplementary Figure 1: Detailed view of the BridGE method for detecting genetic interactions from  
10 GWAS data.

11

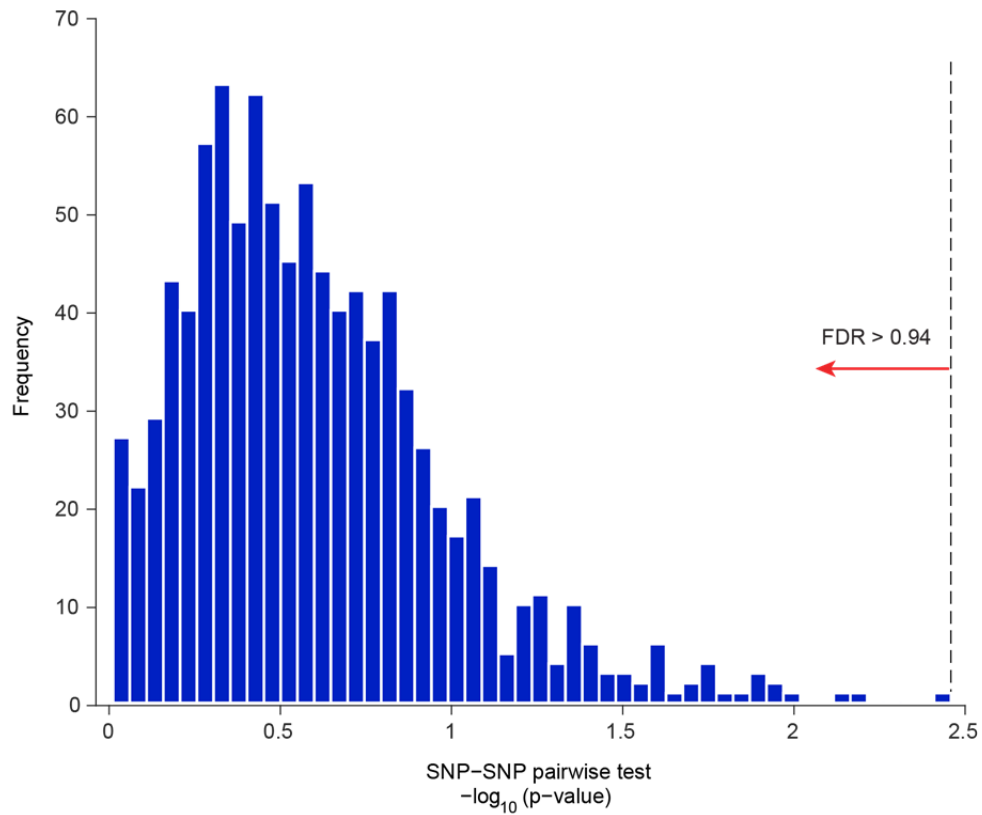

12  
 13 Supplementary Figure 2: Distribution of p-values from individual tests for pairwise SNP-SNP interactions  
 14 for discovered Parkinson's disease BPM. SNP pairs supporting the pathway-pathway interaction between  
 15 the Golgi associated vesicle biogenesis gene set (Reactome) and Fc epsilon receptor I signaling pathway  
 16 (KEGG) discovered from the PD-NIA Parkinson's disease cohort were evaluated for association with PD  
 17 based on a recessive and dominant disease model. The distribution of maximum  $-\log_{10}$  hypergeometric  
 18 test p-value of the two models for each SNP pair is plotted. None of the SNP pairs are significant after  
 19 multiple hypothesis correction (dashed line at the most significant SNP-SNP pair corresponds to  
 20 FDR=0.94).

21

A

FDR = 0.25, Scale = 0.025

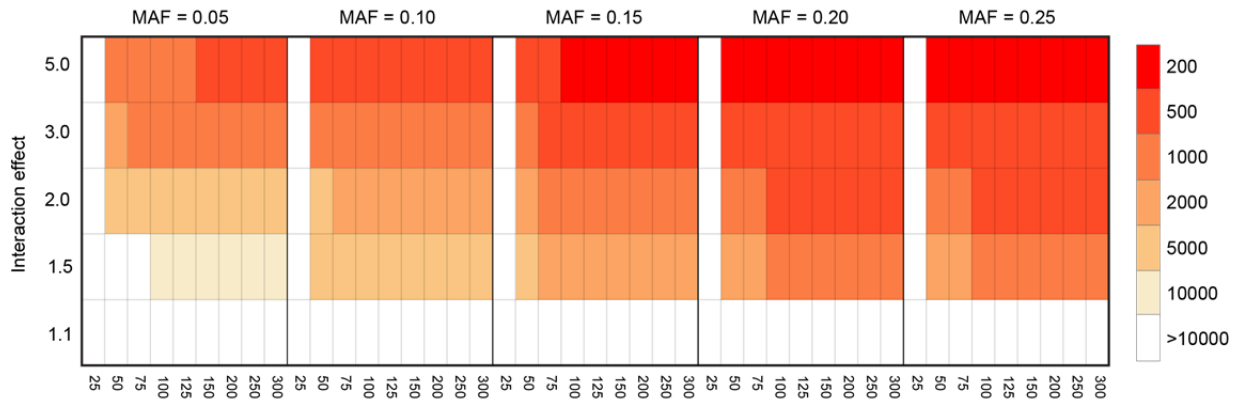

B

FDR = 0.25, Scale = 0.1

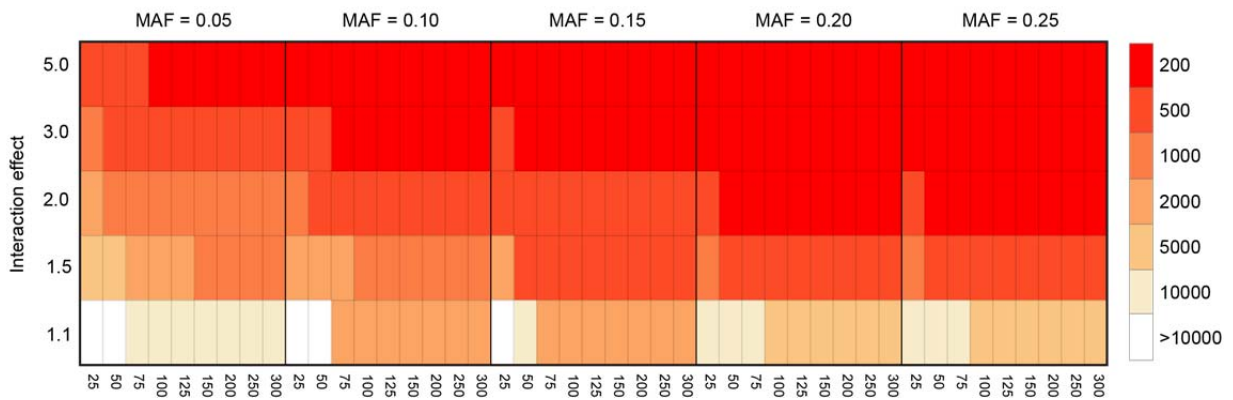

22

23 Supplementary Figure 3: Power analysis of the effect of minor allele frequency (MAF), BPM size,  
 24 interaction effect size, and sample size on the discovery of between-pathway interactions. The plot is  
 25 same as Fig. 6, but the biological densities used are 2.5% (a) and 10% (b).

26

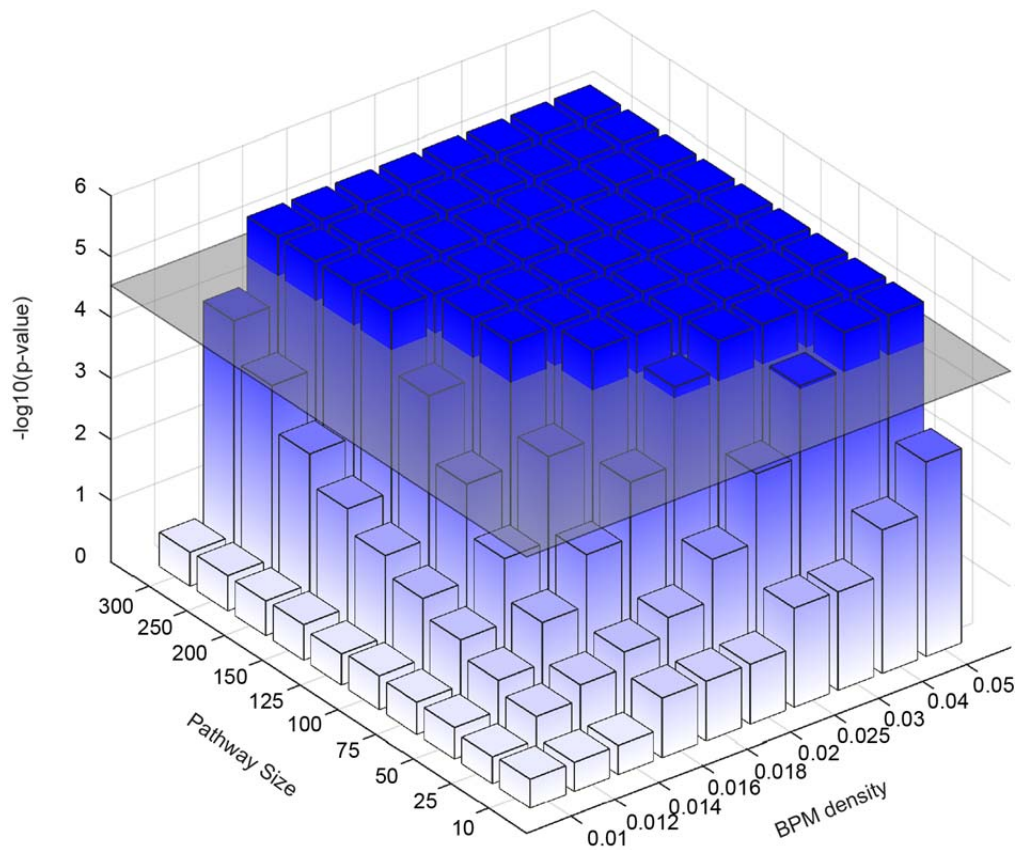

27

28 Supplementary Figure 4: Power simulation of the effect of pathway size and interaction density on the  
 29 discovery of between-pathway interactions. The BPM significance ( $-\log_{10}$  p-value derived from 150,000  
 30 SNP permutations) is plotted for 100 embedded BPMs of different sizes and SNP-SNP interaction  
 31 densities (online method). The gray plane indicates the p-value cutoff corresponding to the average SNP  
 32 permutation p-values ( $p = 3.0 \times 10^{-5}$ ) of the significant BPM discoveries across all GWAS cohorts  
 33 ( $\text{FDR} \leq 0.25$ ). Bars exceeding this plane represent BPMs that would have been discovered in this cohort  
 34 and provide an estimate of sensitivity of the approach.

35

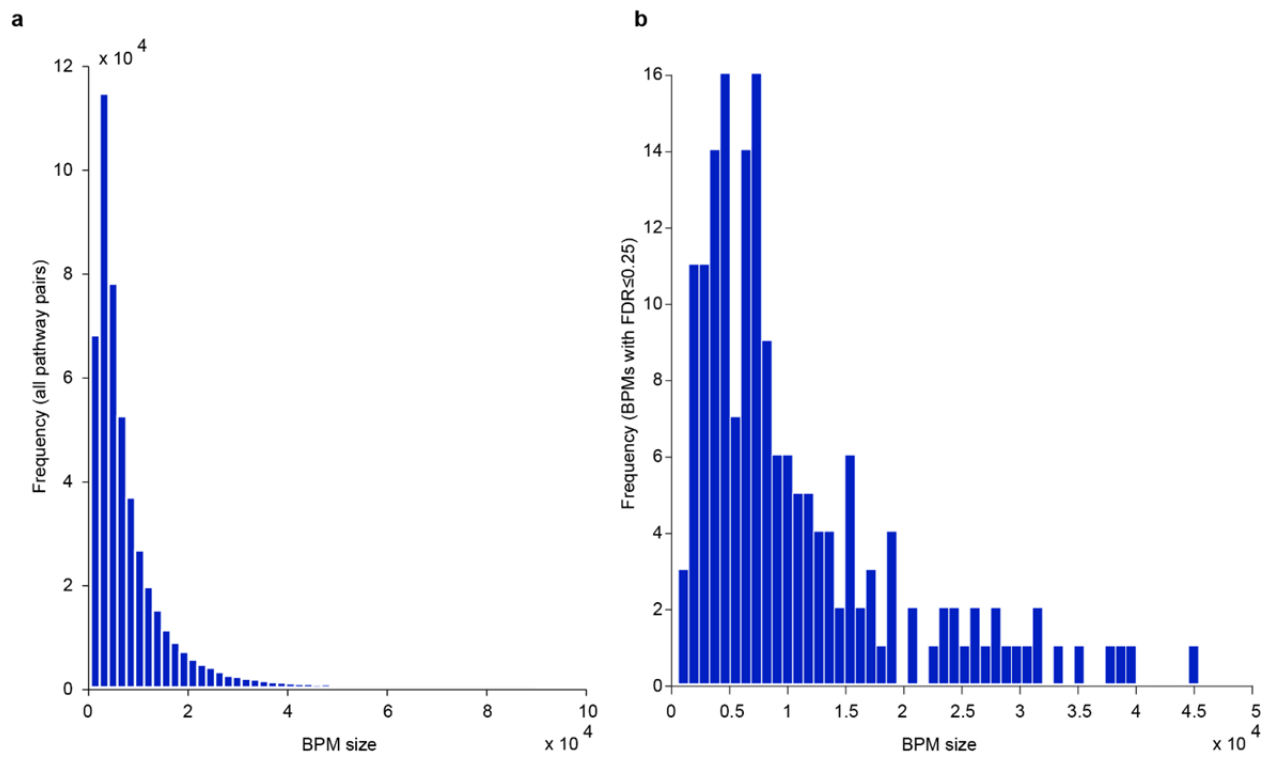

36

37 Supplementary Figure 5: Distribution of sizes for discovered BPMs. The size of each candidate BPM was  
 38 measured as the total number of possible SNP-SNP pairs between the two pathways. The distribution of  
 39 sizes of all possible pathway-pathway pairs is plotted in (a) and only significant BPMs ( $FDR \leq 0.25$ ) from  
 40 the PD-NIA cohort are plotted in (b). BPMs discovered by BridGE span a large range of sizes.

41

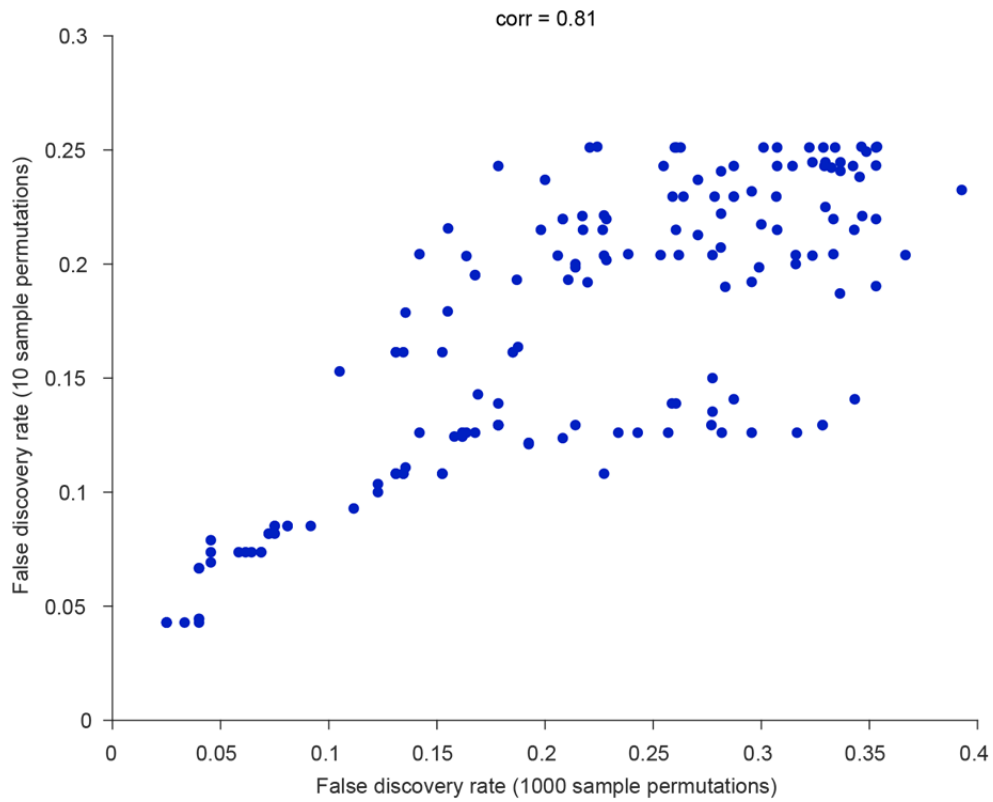

42

43 Supplementary Figure 6: Comparison of false discovery rates derived from 10 sample permutations vs.  
44 1000 sample permutations using PD-NIA dataset. BPMs that are significant ( $FDR \leq 0.25$ ) based on either  
45 10 sample permutations or 1000 permutations were plotted to show the agreement between two  
46 permutations.

47

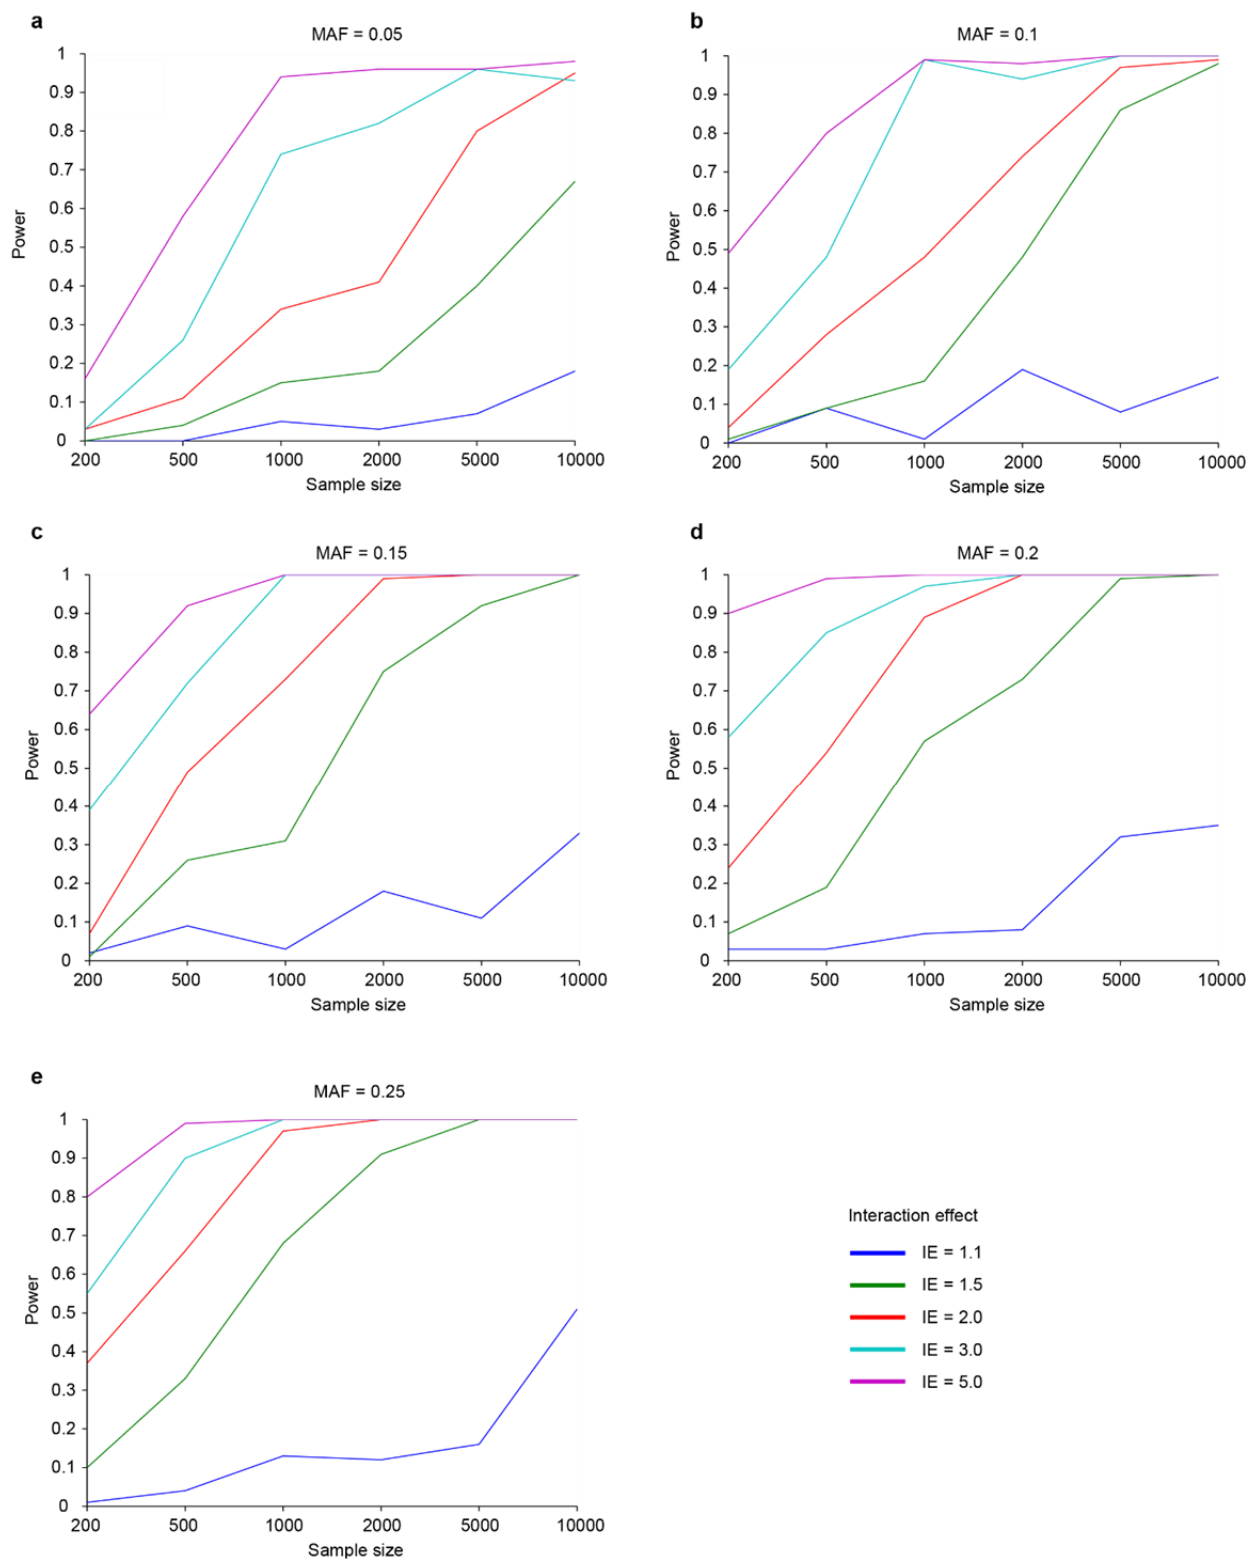

48

49 Supplementary Figure 7: Power simulation of the effect of sample size, interaction effect size (IE) and  
 50 minor allele frequency on the discovery of SNP-SNP interactions. The discovery rates of 100 embedded  
 51 SNP-SNP interactions in the synthetic datasets with different sample sizes were plotted and colored with  
 52 corresponding interaction effect size. Each subplot is corresponded to a different minor allele frequency  
 53 assumption: (a) MAF=0.05, (b) MAF=0.1, (c) MAF=0.15, (d) MAF=0.2, (e) MAF=0.25.



54 **Supplementary Discussion**

55 **BridGE results on hypertension and type2 diabetes**

56 Although we did not conduct replication analyses for hypertension or type 2 diabetes, we found that many  
57 of the pathways involved in interactions from the discovery cohorts were also highly relevant to the  
58 corresponding disease. For example, in the hypertension cohort, we identified a risk-associated BPM  
59 interaction involving hypoxia inducible factor (HIF) signaling, whose aberrant expression has been  
60 previously associated with hypertension<sup>1</sup>. Two BPMs and one WPM, all associated with increased risk,  
61 involved the Rho cell motility signaling pathway, which has been previously implicated in the  
62 pathogenesis of hypertension<sup>2</sup>. For type 2 diabetes, we discovered BPMs associated with protective  
63 effects involving an autoimmune thyroid disease gene set, glycosaminoglycan biosynthesis, and the  
64 mTOR signaling pathway, all of which have strong links to diabetes<sup>3,4,5</sup>.

65

66

67 **Additional Acknowledgements**

68 The genome-wide association datasets (PD-NIA, PD-NGRC, SZ-GAIN, BC-CGEMS-EUR, BC-MCS-  
69 JPN, BC-MCS-LTN, HT-eMERGE, ProC-CGEMS, ProC-BPC3 and PanC-PanScan) used in this study  
70 were obtained from <https://www.ncbi.nlm.nih.gov/gap> through dbGaP accession numbers:  
71 phs000089.v3.p2, phs000196.v3.p1, phs000021.v3.p2, phs000147.v3.p1, phs000517.v3.p1,  
72 phs000297.v1.p1, phs000207.v1.p1, phs000812.v1.p1, and phs000206.v5.p3. We acknowledge the  
73 Contributing Investigators who submitted data from their original study to dbGaP, the primary funding  
74 organization that supported the Contributing Investigators, and the NIH data repository.

75 The genome-wide association datasets (SZ-GAIN, HT-WTCCC, T2D-WTCCC) used in this study  
76 were provided by Wellcome Trust Case Control Consortium through Dataset Accession numbers:  
77 EGAD00000000006, EGAD00000000009 and EGAD00000000001 and EGAD00000000002. These  
78 were funded by the Wellcome Trust under award 076113 and a full list of the investigators who  
79 contributed to the generation of the data is available from [www.wtccc.org.uk](http://www.wtccc.org.uk).

80 **PD-NIA (phs000089.v3.p2):**

81 The genotyping of samples was provided by the National Institute of Neurological Disorders and Stroke  
82 (NINDS). The dataset used for the analyses described in this manuscript were obtained from the NINDS  
83 Database found at <https://www.ncbi.nlm.nih.gov/gap>

84 **PD-NGRC (phs000196.v3.p1):**

85 This work utilized in part data from the NINDS DbGaP database from the CIDR:NGRC PARKINSON'S  
86 DISEASE STUDY.

87 **SZ-GAIN (phs000021.v3.p2):**

88 Funding support for the Genome-Wide Association of Schizophrenia Study was provided by the National  
89 Institute of Mental Health (R01 MH67257, R01 MH59588, R01 MH59571, R01 MH59565, R01  
90 MH59587, R01 MH60870, R01 MH59566, R01 MH59586, R01 MH61675, R01 MH60879, R01  
91 MH81800, U01 MH46276, U01 MH46289 U01 MH46318, U01 MH79469, and U01 MH79470) and the  
92 genotyping of samples was provided through the Genetic Association Information Network (GAIN). The  
93 datasets used for the analyses described in this manuscript were obtained from the database of Genotypes

94 and Phenotypes (dbGaP) found at <http://www.ncbi.nlm.nih.gov/gap> through dbGaP accession number  
95 phs000021.v3.p2. Samples and associated phenotype data for the Genome-Wide Association of  
96 Schizophrenia Study were provided by the Molecular Genetics of Schizophrenia Collaboration (PI: Pablo  
97 V. Gejman, Evanston Northwestern Healthcare (ENH) and Northwestern University, Evanston, IL, USA).

98 **BC-CGEMS-EUR (phs000147.v3.p1):**

99 This dataset was from the Cancer Genetic Markers of Susceptibility (CGEMS) Breast Cancer Genome-  
100 wide Association Study with dbGaP accession number phs000147.v3.p1.

101 **BC-MCS-LTN, BC-MCS-JPN (phs000517.v3.p1):**

102 The Multiethnic Cohort and the genotyping in this study were funded by grants from the National  
103 Institute of Health (CA63464, CA54281, CA098758, CA132839 and HG005922) and the Department of  
104 Defense Breast Cancer Research Program (W81XWH-08-1-0383).

105 **HT-eMERGE (phs000297.v1.p1):**

106 Group Health Cooperative/University of Washington – Funding support for Alzheimer's Disease Patient  
107 Registry (ADPR) and Adult Changes in Thought (ACT) study was provided by a U01 from the National  
108 Institute on Aging (Eric B. Larson, PI, U01AG006781). A gift from the 3M Corporation was used to  
109 expand the ACT cohort. DNA aliquots sufficient for GWAS from ADPR Probable AD cases, who had  
110 been enrolled in Genetic Differences in Alzheimer's Cases and Controls (Walter Kukull, PI, R01  
111 AG007584) and obtained under that grant, were made available to eMERGE without charge. Funding  
112 support for genotyping, which was performed at Johns Hopkins University, was provided by the NIH  
113 (U01HG004438). Genome-wide association analyses were supported through a Cooperative Agreement  
114 from the National Human Genome Research Institute, U01HG004610 (Eric B. Larson, PI).

115 Mayo Clinic – Samples and associated genotype and phenotype data used in this study were provided  
116 by the Mayo Clinic. Funding support for the Mayo Clinic was provided through a cooperative agreement  
117 with the National Human Genome Research Institute (NHGRI), Grant #: U01HG004599; and by grant  
118 HL75794 from the National Heart Lung and Blood Institute (NHLBI). Funding support for genotyping,  
119 which was performed at The Broad Institute, was provided by the NIH (U01HG004424).

120 Marshfield Clinic Research Foundation – Funding support for the Personalized Medicine Research  
121 Project (PMRP) was provided through a cooperative agreement (U01HG004608) with the National  
122 Human Genome Research Institute (NHGRI), with additional funding from the National Institute for  
123 General Medical Sciences (NIGMS) The samples used for PMRP analyses were obtained with funding  
124 from Marshfield Clinic, Health Resources Service Administration Office of Rural Health Policy grant  
125 number D1A RH00025, and Wisconsin Department of Commerce Technology Development Fund  
126 contract number TDF FYO10718. Funding support for genotyping, which was performed at Johns  
127 Hopkins University, was provided by the NIH (U01HG004438).

128 Northwestern University – Samples and data used in this study were provided by the NUGene Project  
129 ([www.nugene.org](http://www.nugene.org)). Funding support for the NUGene Project was provided by the Northwestern  
130 University’s Center for Genetic Medicine, Northwestern University, and Northwestern Memorial Hospital.  
131 Assistance with phenotype harmonization was provided by the eMERGE Coordinating Center (Grant  
132 number U01HG04603). This study was funded through the NIH, NHGRI eMERGE Network  
133 (U01HG004609). Funding support for genotyping, which was performed at The Broad Institute, was  
134 provided by the NIH (U01HG004424).

135 Vanderbilt University - Funding support for the Vanderbilt Genome-Electronic Records (VGER)  
136 project was provided through a cooperative agreement (U01HG004603) with the National Human  
137 Genome Research Institute (NHGRI) with additional funding from the National Institute of General  
138 Medical Sciences (NIGMS). The dataset and samples used for the VGER analyses were obtained from  
139 Vanderbilt University Medical Center's BioVU, which is supported by institutional funding and by the  
140 Vanderbilt CTSA grant UL1RR024975 from NCR/NIH. Funding support for genotyping, which was  
141 performed at The Broad Institute, was provided by the NIH (U01HG004424).

142 Assistance with phenotype harmonization and genotype data cleaning was provided by the eMERGE  
143 Administrative Coordinating Center (U01HG004603) and the National Center for Biotechnology  
144 Information (NCBI). The datasets used for the analyses described in this manuscript were obtained from  
145 dbGaP at <http://www.ncbi.nlm.nih.gov/gap> through dbGaP accession number phs000297.v1.p1.

146 **ProC-CGEMS (phs000207.v1.p1):**

147 This data was from the Cancer Genetic Markers of Susceptibility (CGEMS) Prostate Cancer Genome-  
148 Wide Association Study.

149 **ProC-BPC3 (phs000812.v1.p1):**

150 The Breast and Prostate Cancer Cohort Consortium (BPC3) genome-wide association studies of advanced  
151 prostate cancer and estrogen-receptor negative breast cancer was supported by the National Cancer  
152 Institute under cooperative agreements U01-CA98233, U01-CA98710, U01-CA98216, and U01-  
153 CA98758 and the Intramural Research Program of the National Cancer Institute, Division of Cancer  
154 Epidemiology and Genetics.

155 **PanC-PanScan (phs000206.v5.p3):**

156 This project was funded in whole or in part with federal funds from the National Cancer Institute (NCI),  
157 US National Institutes of Health (NIH) under contract number HHSN261200800001E. Additional support  
158 was received from NIH/NCI K07 CA140790, the American Society of Clinical Oncology Conquer  
159 Cancer Foundation, the Howard Hughes Medical Institute, the Lustgarten Foundation, the Robert T. and  
160 Judith B. Hale Fund for Pancreatic Cancer Research and Promises for Purple. A full list of  
161 acknowledgments for each participating study is provided in the Supplementary Note of the manuscript  
162 with PubMed ID: 25086665.

163

164 **Supplementary References**

165

166 1. Farha S, *et al.* Hypoxia-inducible factors in human pulmonary arterial hypertension: a link to the intrinsic  
167 myeloid abnormalities. *Blood* **117**, 3485-3493, <https://doi.org/10.1182/blood-2010-09-306357>, (2011).

168

169 2. Loirand G, Pacaud P. The role of Rho protein signaling in hypertension. *Nat Rev Cardiol* **7**, 637-647,  
170 <https://doi.org/10.1038/nrcardio.2010.136>, (2010).

171

172 3. Wang C. The Relationship between Type 2 Diabetes Mellitus and Related Thyroid Diseases. *J Diabetes*  
173 *Res* **2013**, 390534, <https://doi.org/10.1155/2013/390534>, (2013).

174

175 4. Gowd V, Gurukar A, Chilkunda ND. Glycosaminoglycan remodeling during diabetes and the role of  
176 dietary factors in their modulation. *World J Diabetes* **7**, 67-73, <https://doi.org/10.4239/wjd.v7.i4.67>, (2016).

177

178 5. Verges B, Cariou B. mTOR inhibitors and diabetes. *Diabetes Res Clin Pract* **110**, 101-108,  
179 <https://doi.org/10.1016/j.diabres.2015.09.014>, (2015).

180

181
